# Supplementary material for: IGF1 Knockdown Hinders Myocardial Development through Energy Metabolism Dysfunction Caused by ROS-Dependent FOXO Activation in the Chicken Heart
Source: Hindawi journal article supplement (doi:10.1155/2019/7838754), 2019-12-24

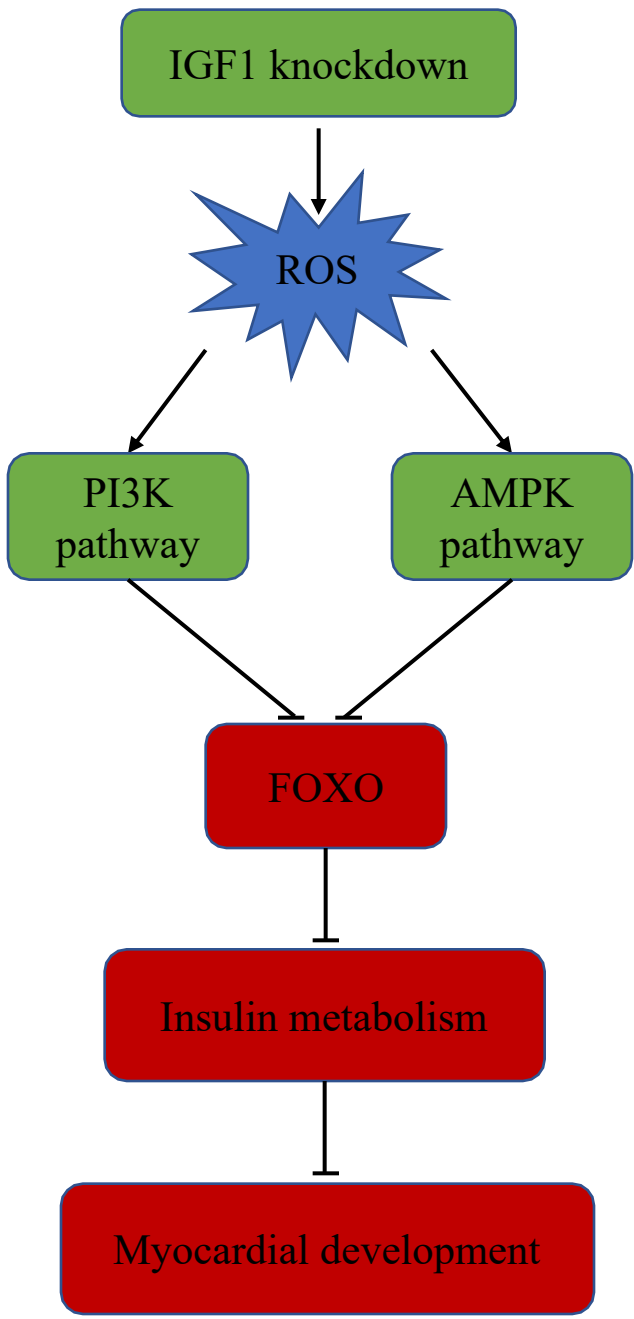

Supplement: f1 [file 7838754.f1.pdf]
